# Supplementary material for: Spheroid Coculture of Hematopoietic Stem/Progenitor Cells and Monolayer Expanded Mesenchymal Stem/Stromal Cells in Polydimethylsiloxane Microwells Modestly Improves In Vitro Hematopoietic Stem/Progenitor Cell Expansion
Source: PubMed Central journal article supplement (PMC5397247; doi:10.1089/ten.tec.2016.0329), 2017-04-01
Supplement: Supp_Fig2.pdf [file Supp_Fig2.pdf]

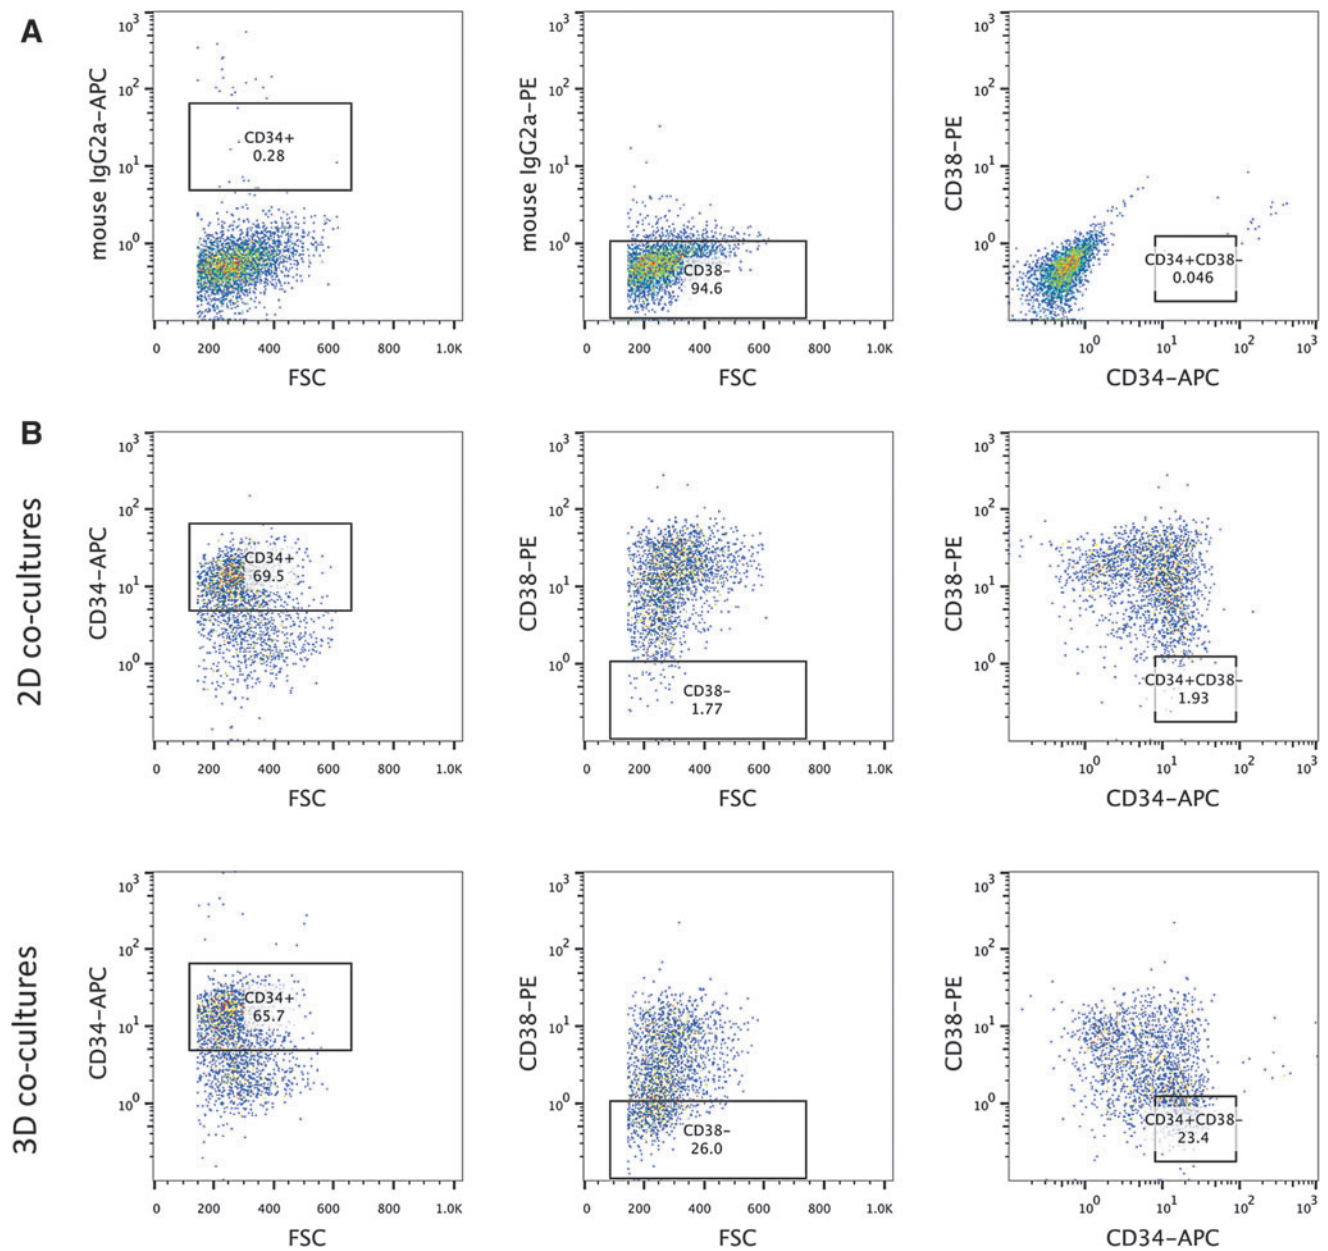

**SUPPLEMENTARY FIG. S2.** Flow cytometry gating strategy for hematopoietic progenitor cell surface marker expression on expanded CD34<sup>+</sup> cells. Cells stained with isotype controls for CD34-APC (*left panel*) and CD38-PE (*middle panel*) (**A**); and single color-stained sample with anti-CD45-FITC, shown in the APC and PE channel (*right panel*) (**A**). Expanded hematopoietic cells were first gated on FSC SSC, followed by CD45<sup>+</sup> (see Supplementary Fig. S2), and then subsequently by gating for CD34<sup>+</sup> cells, CD38<sup>-</sup> cells, and CD34<sup>+</sup>CD38<sup>-</sup> cells (**B**). Representative fluorescence plots for 2D cocultures are shown in *top panels* and for 3D cocultures in *bottom panels*.
